# Supplementary material
Source: publisher site journal article supplement (https://www.dovepress.com/article/328776)
Supplement: Supplementary file 1 [file get_supplementary_file.php]

***Appendix-A***

***Questionnaire***

| **Constructs** | **Items Code** | **Measurement Items** |
| --- | --- | --- |
| ***Supervisor rated (The employee I am going to rate):*** | | |
| **Employees' Pro-environmental Behavior** | **EPB1** | At work, recycles whenever possible. |
| **EPB2** | Helps the co-workers to be environmentally friendly at work. |
| **EPB3** | Saves the amount of materials used at work. |
| **EPB4** | Promotes environmentally friendly behaviors amongst the coworkers. |
| **EPB5** | Persuades organization to purchase environmentally friendly products. |
| **EPB6** | At work, reduces the amount of energy use. |
| **EPB7** | Discusses with me how the organization can become more environmentally friendly. |
| **EPB8** | Suggests to the coworkers that they should reduce the amount of materials they use. |
| **EPB9** | Encourages organization to support an environmental charity. |
| **EPB10** | Encourages organization to reduce its environmental impact. |
| ***Employees' rated*** | | |
| **Environmentally-specific Servant Leadership** | **ESL1** | My supervisor cares about my eco-initiatives. |
| **ESL2** | My supervisor emphasizes the importance of contributing to the environmental improvement. |
| **ESL3** | My supervisor is involved in environmental activities. |
| **ESL4** | I am encouraged by my supervisor to volunteer in environmental activities. |
| **ESL5** | My supervisor has a thorough understanding of our company and its environmental goals. |
| **ESL6** | My supervisor encourages me to contribute eco-initiatives. |
| **ESL7** | My supervisor gives me the freedom to handle environmental problems in the way that I feel is best. |
| **ESL8** | My supervisor does what she/he can do to realize my eco-initiatives. |
| **ESL9** | My supervisor holds high environmental standards. |
| **ESL10** | My supervisor always displays green behaviors. |
| **ESL11** | My supervisor would not compromise environmental principles in order to achieve success. |
| **ESL12** | My supervisor values environmental performance more than profits. |
| **Green Self-efficacy** | **GSE1** | I feel I can succeed in accomplishing environmental ideas. |
| **GSE2** | I can achieve most of environmental goals. |
| **GSE3** | I feel competent to deal effectively with environmental tasks. |
| **GSE4** | I can perform effectively on environmental missions. |
| **GSE5** | I can overcome environmental problems. |
| **GSE6** | I could find out creative solutions to environmental problems. |
